# Supplementary material
Source: publisher site journal article supplement (http://www.spandidos-publications.com/1422/downloadSupplementary)

Figure S1. Morphological changes associated with the epithelial-mesenchymal transition in PC3 and DU145 cells. Images were captured under an optical inverted microscope. miR, microRNA; Con, control; H, hypoxia; NC, miR-137 negative control.

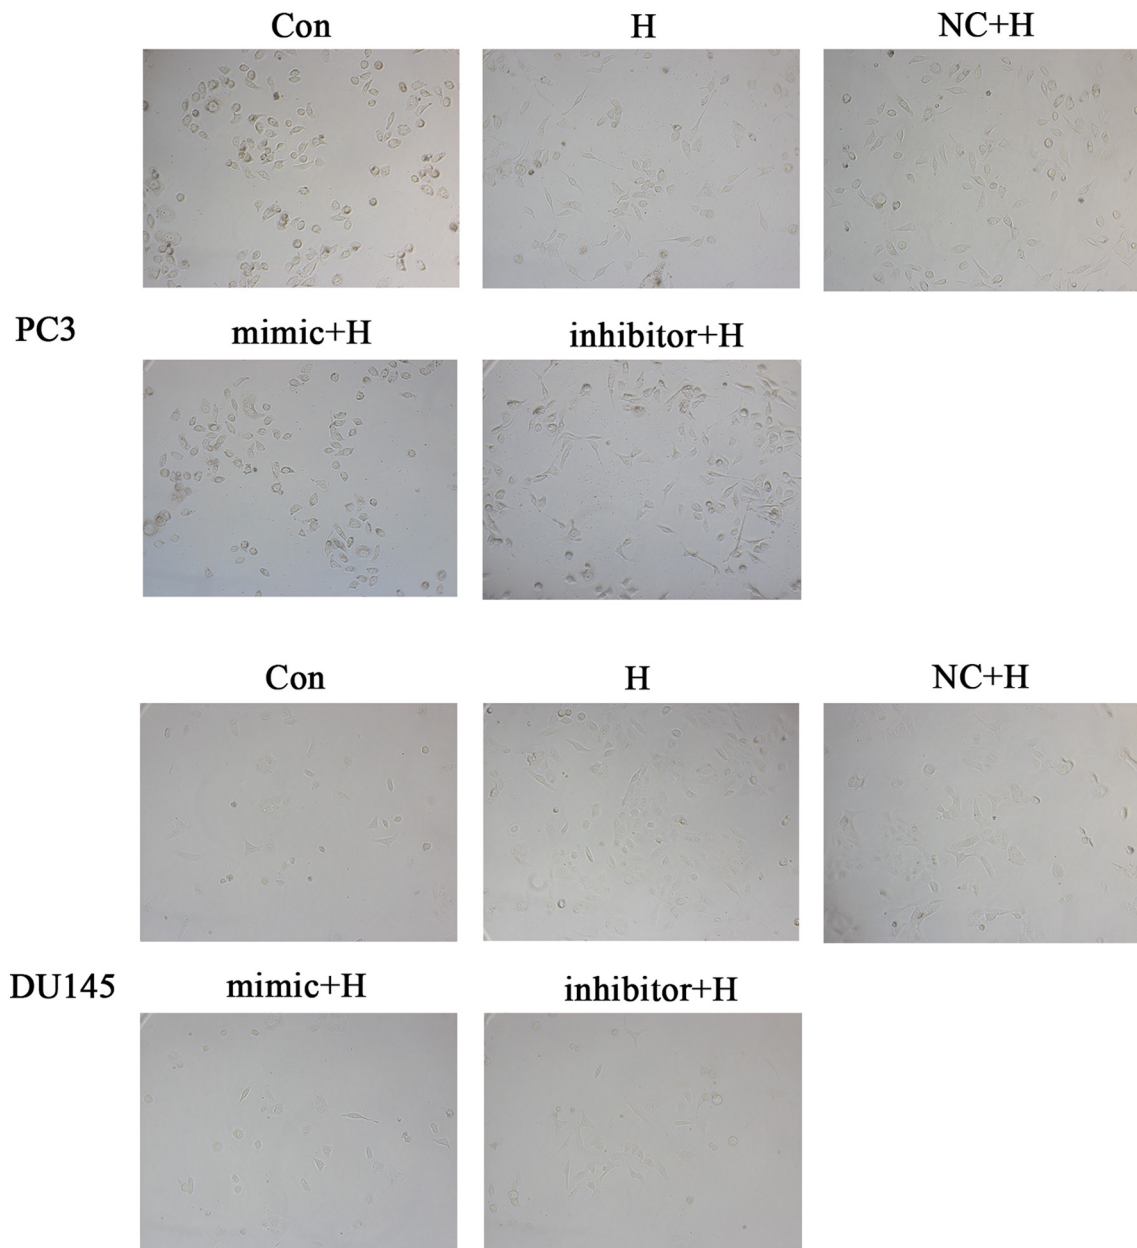

Figure S2. The expression of LGR4 is reduced in PC3 cells after transfection with siLGR4. (A) RT-qPCR was used to detect the mRNA level of LGR4. (B) The protein level of LGR4 was evaluated by western blotting. \* $P < 0.05$  vs. Control. RT-qPCR, reverse transcription-quantitative PCR; si, small interfering RNA; LGR4, leucine-rich repeat-containing G protein-coupled receptor 4; siCtrl, negative control for siLGR4.

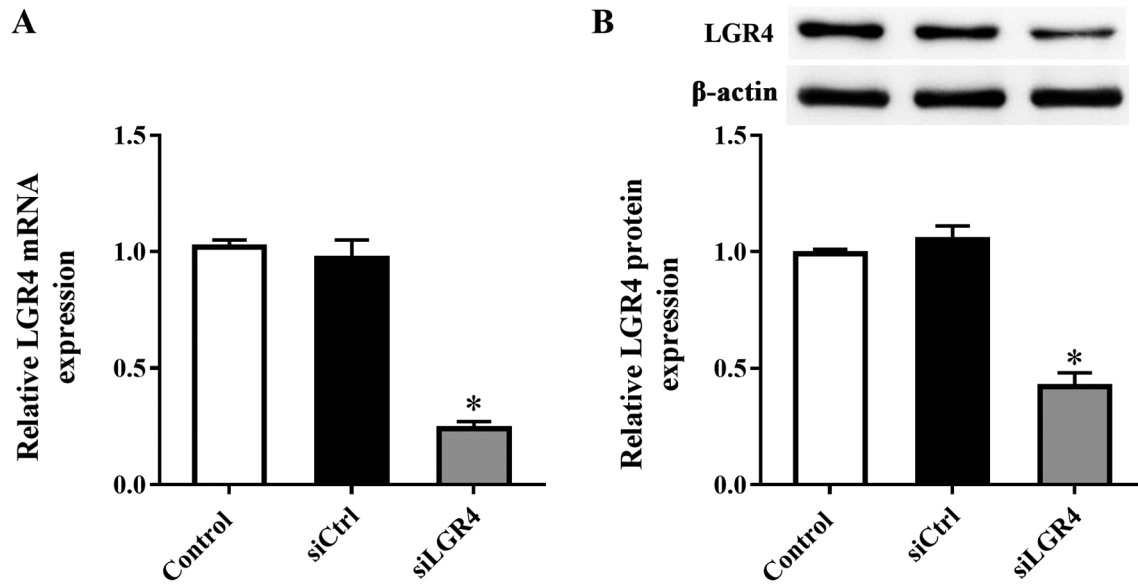

Supplement: Supplementary file 1 [file downloadSupplementary]
